# Supplementary material for: Investigating the Therapeutic Potential of Lepidium sativum-Derived Compounds in Prostate Cancer: An Integrative in Silico Approach
Source: Research Square preprint supplement (doi:10.21203/rs.3.rs-7302675/v1), 2025-10-20
Supplement: Supplementary file 1 [file c20700ae85e4bacff10b6e64.xlsx]

## Sheet: Sheet1
		Investigating the Therapeutic Potential of Lepidium sativum-Derived Compounds in Prostate Cancer: An Integrative in Silico Approach
		Said Bitam, Djamel Atsamnia, Mabrouk Hamadache, Salah Hanini
		Faculté de Technologie, Département du Génie des Procédés et Environnement, Laboratoire des Biomatériaux et Phénomènes de Transport (LBMPT), Université de Médéa, Algérie

## Sheet: S1
SELECTED COMPOUNDS
Original Names	New Names	Canonical SMILES	Formula	MW	Hepatotoxicity	Neurotoxicity	Nephrotoxicity	Respiratory toxicity	Cardiotoxicity	Carcinogenicity	Immunotoxicity	Mutagenicity	Cytotoxicity	Rotatable bonds	H-bond acceptors	H-bond donors	MR	TPSA	iLOGP	XLOGP3	WLOGP	MLOGP	Silicos-IT Log P	Consensus Log P	ESOL Log S	ESOL Solubility (mg/ml)	ESOL Solubility (mol/l)	ESOL Class	Ali Log S	Ali Solubility (mg/ml)	Ali Solubility (mol/l)	Ali Class	Silicos-IT LogSw	Silicos-IT Solubility (mg/ml)	Silicos-IT Solubility (mol/l)	Silicos-IT class	GI absorption	BBB permeant	Pgp substrate	CYP1A2 inhibitor	CYP2C19 inhibitor	CYP2C9 inhibitor	CYP2D6 inhibitor	CYP3A4 inhibitor	log Kp (cm/s)	Lipinski violations	Ghose violations	Veber violations	Egan violations
Molecule 86	/	CCOC(=O)C(ON1C(=O)c2c(C1=O)cccc2)CC	C14H15NO5	277.27	Inactive	Inactive	Active	Active	Inactive	Inactive	Inactive	Active	Inactive	6	5	0	73.13	72.91	2.28	2.16	1.18	1.62	1.66	1.78	-2.75	0.498	0.0018	Soluble	-3.32	0.132	0.000475	Soluble	-3.12	0.209	0.000753	Soluble	High	No	No	No	Yes	No	No	No	-6.46	0	0	0	0
Molecule 87	/	CCOC(=O)C(ON1C(=O)c2c(C1=O)cccc2)C	C13H13NO5	263.25	Inactive	Inactive	Active	Active	Inactive	Inactive	Inactive	Active	Inactive	5	5	0	68.32	72.91	2.17	1.63	0.78	1.36	1.27	1.44	-2.4	1.04	0.00396	Soluble	-2.77	0.443	0.00168	Soluble	-2.72	0.499	0.0019	Soluble	High	No	No	No	No	No	No	No	-6.75	0	0	0	0
Molecule 91	/	CCCOC(=O)C(ON1C(=O)c2c(C1=O)cccc2)C	C14H15NO5	277.27	Inactive	Inactive	Active	Active	Inactive	Active	Inactive	Active	Inactive	6	5	0	73.13	72.91	2.36	2.16	1.18	1.62	1.66	1.79	-2.75	0.498	0.0018	Soluble	-3.32	0.132	0.000475	Soluble	-3.12	0.209	0.000753	Soluble	High	No	No	No	Yes	No	No	No	-6.46	0	0	0	0
Molecule 93	Compound 01	CC(OC(=O)C(ON1C(=O)c2c(C1=O)cccc2)C)C	C14H15NO5	277.27	Inactive	Inactive	Inactive	Inactive	Inactive	Inactive	Inactive	Inactive	Inactive	5	5	0	73.13	72.91	2.5	2.07	1.17	1.62	1.49	1.77	-2.76	0.487	0.00176	Soluble	-3.23	0.163	0.000588	Soluble	-2.75	0.494	0.00178	Soluble	High	No	No	No	Yes	No	No	No	-6.52	0	0	0	0
Molecule 95	Compound 02	CCC(OC(=O)C(ON1C(=O)c2c(C1=O)cccc2)C)C	C15H17NO5	291.3	Inactive	Inactive	Inactive	Inactive	Inactive	Inactive	Inactive	Inactive	Inactive	6	5	0	77.93	72.91	2.56	2.59	1.56	1.88	1.88	2.09	-3.09	0.235	0.000807	Soluble	-3.77	0.0495	0.00017	Soluble	-3.15	0.207	0.00071	Soluble	High	No	No	No	Yes	No	No	No	-6.24	0	0	0	0
Molecule 98	Compound 03	O=C(C(ON1C(=O)c2c(C1=O)cccc2)C)OC(C)(C)C	C15H17NO5	291.3	Inactive	Inactive	Inactive	Inactive	Inactive	Inactive	Inactive	Inactive	Inactive	5	5	0	77.97	72.91	2.65	2.25	1.56	1.88	1.72	2.01	-2.94	0.331	0.00114	Soluble	-3.42	0.111	0.000383	Soluble	-3.13	0.215	0.00074	Soluble	High	No	No	No	Yes	No	No	No	-6.48	0	0	0	0
Molecule 214	/	OC[C@@H]1C(=O)O[C@H]2[C@H]1CCC(=C)[C@H]1[C@@H]2C(=C)[C@@H](C1)O	C15H20O4	264.32	Inactive	Inactive	Active	Active	Inactive	Inactive	Active	Inactive	Inactive	1	4	2	70.54	66.76	1.94	0.76	1.04	1.62	1.61	1.39	-1.89	3.39	0.0128	Very soluble	-1.74	4.79	0.0181	Very soluble	-1.48	8.69	0.0329	Soluble	High	No	No	No	No	No	No	No	-7.37	0	0	0	0
[truncated: 6 more columns]

## Sheet: S2
Protein Targets
protein targets of selected compounds	Prostate tagets from Gencard	Prostate tagets from DisgNet (C0600139)	Prostate tagets from CTD	Common targets using Venn diagram	HUB genes using Cytoscape program
GRM5	AR	IGF1R	AAAS	PIK3CA	MMP9
ELANE	HOXB13	MMP7	ABCC4	ESR2	PPARA
PIK3CA	BRCA2	MKI67	ABCG5	ALOX5	AKT1
ESR2	PTEN	PCAT1	ABO	MAPK9	GSK3B
NAAA	CHEK2	CDKN1B	ABR	GSK3B	PIK3CA
CASP3	PCA3	HOXB13	ACE	GSTP1	ESR1
CRHR1	RNASEL	ESR2	ACHE	CBR1	MDM2
CES1	CDH1	FGFR2	ACRBP	PDE4D	ESR2
ADORA1	ELAC2	KLK3	ACSL4	NQO1	STAT3
ADORA2B	PCAT1	MSMB	ACSM3	MMP9	SOD2
CA14	TP53	ATM	ADAM26A	PPARA
HSD11B1	PRNCR1	BCL2	ADAM28	VDR
ALOX15	SCHLAP1	BRCA2	ADAM9	AKT1
KAT2B	ATM	HNF1B	ADAMTS8	MIF
ALOX5	BRCA1	CASP6	ADGRG1	MDM2
CDK2	PCAT7	CASP8	ADI1	RXRA
CCNA1	SPOP	JAZF1	ADRB2	IL2
CCNA2	PCAT2	MDM4	AGR2	SHBG
CDK2	PCAT29	PRNCR1	AHCYL2	ESR1
TLR9	PCAT14	MYO6	AHR	ST14
ADORA2A	PCSEAT	SLC22A3	AKAP13	PAK6
FKBP1A	PCAT6	CTBP2	AKR1C3	ABO
CTSK	PCAT5	RFX6	AKT1	MET
IDO1	PCAT18	FHIT	AKT2	TAP1
TRPA1	AKT1	TCF7L2	ALAD	SULT2B1
BCAT2	SRD5A2	POU5F1B	ALDH1A2	SULT2A1
BCAT1	MSMB	RASA1	ALOX12B	HSD17B1
MAPK8	MSR1	LDAH	ALOX5	SOD2
MAPK10	EGFR	CDKN2B-AS1	ALOXE3	AURKA
MAPK9	POLK	SPINT2	AMACR	GSTA1
CDK5R1	KLK3	FOXP4	ANTXR2	CTSD
CDK5	MSH6	LMTK2	ANXA1	TRIM24
KLKB1	KLF6	PDLIM5	ANXA3	STAT3
CCNE2	EPHB2	PHLPP2	ANXA4	APEX1
CDK2	NBN	RGS17	AOX1
CCNE1	HNF1B	KRT8	APC
GSK3B	PIK3CA	PRKCI	APEX1
CES2	PCGEM1	MAP2K1	APPL2
GSTP1	C11orf65	EMSY	AR
ALDR	MXI1	PCAT19	ARG2
CHK1	LOC109504725	MARCHF8	ARHGAP6
PDE4B	PVT1	ZNF652	ARHGEF5
PDPK1	MIRLET7C	EHBP1	ARID1A
ANXA5	CBR3-AS1	FSHR	ARID2
FNTA	GAS5	SUN2	ARID4A
MAOM	HPC4	HLA-B	ARL6IP1
PTN1	MIR182	NEDD9	ASF1B
TPA	H19	RAD51B	ASH1L
CTNA1	ZFHX3	TCF4	ASZ1
EST1	MIR320A	MLPH	ATAD3A
CBR1	MIR145	PPFIBP2	ATAT1
FA10	CD82	TSPOAP1-AS1	ATF3
THRB	MIR21	CCAT2	ATM
CDK6	HPC3	DNAH5	ATP7B
XIAP	MEG3	DNM2	ATR
PPAP	MIR221	FGF10	AURKA
TTHY	MAD1L1	TNRC6B	AZGP1
PDE4D	MIR141	LARP4B	B2M
LEG2	MIR205	NAALADL2	B3GAT1
ISG20	PCAP	GSR	B4GALT4
IGF1R	XIST	INCENP	BAD
NQO1	CDKN2B-AS1	LAMB1	BAP1
CCL5	MIR27B	LRP1B	BAX
ADHX	RAD51D	MIR4435-2HG	BAZ2A
G6PI	MIR375	RPGR	BCAR1
LCK	MIR125A	THADA	BCAS1
MMP9	PCOTH	SIX1	BCL2
PPARA	MIR222	ZGPAT	BCL2L11
HCK	WDFY3	ADGRG1	BGLAP
RENI	MIR146A	NAT2	BIRC5
FPPS	DANCR	CD24	BLTP3A
ADK	CTBP1-AS	BCL2L11	BMP7
DPEP1	TUG1	SH2B3	BMPR1B
MK10	MIR143	TMED7-TICAM2	BNIP3
KTHY	SNHG1	FRY	BRAF
BST1	MIR96	GATA2-AS1	BRCA1
FGFR1	MIR34A	PKN2-AS1	BRCA2
HINT1	MALAT1	CDKN1A	BRD4
FA11	POU5F1B	LINC01169	BRPF1
GSTT2	MIR17	LINC01496	CALCA
CDC42	HOTTIP	CDKN2A	CALR
TRYB2	MIR106B	CASC19	CAMKK2
NR1I2	HOTAIR	CRISP3	CAPNS1
TGM3	MIR195	NDRG1	CASP8
MP2K1	ZFHX3-AS1	YAP1	CASP9
KPYR	LINC00963	VAV3	CASZ1
TIE2	HULC	CIB1	CAV1
LGUL	MIR183	ZNRD2	CAV2
ANDR	SPRY4-IT1	AGR2	CBR1
OAT	MIR23B	AHSA1	CBX1
NGAL	MIR29A	KHDRBS1	CCHCR1
DCK	MIR20A	CXCR6	CCND1
CLK1	MIR100	DCTN6	CCND2
FKB1B	MIR31	MTCO2P12	CCNH
TGFB2	HPC6	LINC02055	CD276
IMDH2	MIR200B	FERMT2	CD46
ADA33	MIR224	IL24	CD9
VDR	MIRLET7B	GLIPR1	CDC27
GMPR1	MIR148A	CHD1	CDCA7
CASP1	TERC	CHD3	CDH1
DAPK1	MIR210	TRIM31	CDH12
RAC1	HPC14	CHGA	CDH13
INSR	MIR191	RASSF1	CDK12
RASH	MIR15A	CHEK2	CDK2AP2
NOS2	NEAT1	SLC52A3	CDKN1A
FKBP3	KCNQ1OT1	FAM83F	CDKN1B
DUT	MIR30A	H3P23	CELF2
AKT1	MIR199B	H3P10	CENPF
FIBG	CCAT2	C10orf90	CENPK
BTK	SOCS2-AS1	CLU	CHD1
FA7	IGF2-AS	COL11A2	CHD3
ST1A1	MIR32	COMT	CHD6
CD5R1	MIR126	KLF6	CHD7
CFAB	UCA1	SLCO6A1	CHEK2
KIF11	MIR449A	CREBBP	CHST14
PPARG	CASC2	DGKK	CIZ1
RORA	ZFAS1	CRK	CLDN3
MIF	MIAT	CRP	CLDN7
MMP8	MIR27A	PARP1	CLDN9
PDE5A	HPC10	MAPK14	CLIC4
PRGR	MIR16-1	CSF2	CLPTM1L
CCNA2	MIR498	ADRA1A	CLU
DHI1	MIR199A1	CTAG1B	CNN3
HS90A	MIR22	CTNNB1	CNOT3
DHSO	MIR203A	CTSB	COL15A1
ADA17	HPC7	ADRA2B	COL23A1
PTN11	MIR23A	GDF7	COL5A1
CCNT1	MIR331	NEK10	COL5A3
KSYK	MIR25	DAB2IP	COMT
AOFB	MIR296	CYP1A1	CPNE3
MDM2	MIR99B	CYP1B1	CREB3L4
TGFR1	MIR181B1	CYP3A4	CREBBP
DPP4	MIR99A	CBLL2	CREG1
PDK2	MIR181A1	CYP17A1	CRYAB
EPHB4	MIR198	CYP19A1	CRYL1
MCR	MIR10A	CYP24A1	CSRP1
JAK3	MIR106A	CYP27B1	CST1
CSK	HPC5	ACE	CST6
FABP7	MIR214	SPATA5	CTBP2
RXRA	MIR223	XAGE3	CTNNB1
IL2	MIR184	DHCR24	CTSB
SHBG	MIR26B	AFM	CTSD
ESR1	MIR151A	DNMT1	CUL3
NR1H3	TRPM2-AS	DOCK2	CX3CL1
RARA	LINC01564	DPT	CXCL12
FABP6	MIR92A2	TOR1A	CXCL8
ST1E1	FENDRR	E2F1	CYP11B2
RET4	MIRLET7G	EDNRA	CYP17A1
CMA1	MIR503	EGF	CYP19A1
RARG	TP53COR1	EGFR	CYP1A1
ST14	MIRLET7D	EGR1	CYP1B1
KPCT	MIR370	AHR	CYP2A6
ZAP70	MIR149	PLPP4	CYP2C18
FABPH	MIR497	RMST	CYP2C19
PPARD	FALEC	EIF4E	CYP2D22
Q14541	HIP1	ELAVL2	CYP2E1
CASP3	MIR30B	EN2	CYP3A4
RAB5A	ERG	EPHB2	CYP3A43
ACADM	SNHG5	ERBB2	CYP3A5
GSTM2	XLOC_007697	ERCC2	CYP7B1
RXRB	SRA1	AKT1	DAB2IP
RARB	MIR10B	ERG	DAG1
ESR2	MIR127	ESR1	DCAF6
PUR2	HCG11	ETV1	DCXR
HXK1	MIR29B2	ETV4	DDR1
ALBU	LINC01138	MECOM	DEFB1
PAK6	POTEF-AS1	EZH2	DEGS1
ELNE	THBS4	PTK2B	DENND4B
PYRD	MIR345	FASN	DHDH
TYSY	HPC15	GPRC6A	DHX30
TPH1	DRAIC	FGF2	DIABLO
FKB1A	RNY3	FGF8	DNAJC10
LEG3	DUXAP9	FGFR1	DNAJC3
PH4H	MIR521-1	FGFR4	DNASE1L2
UROK	XLOC_008559	RALY	DNMT1
O14717	XLOC_009911	KDM2A	DNMT3B
LYAM2	MIR491	FOXM1	DOCK2
APAF	MIR202	FOXO1	DOT1L
PIM1	KRAS	FOXO3	DUBR
CATB	DDX19A-DT	TBC1D9	EAF2
AMPM2	LRRC74B	CAMTA1	EFEMP2
BRAF1	SUZ12P1	TTC28	EGF
PAK7	WARS2-IT1	FN1	EGFR
PTGD2	PCAT4	ADNP	EGR1
SIRT5	PTENP1	SIRT1	EHBP1
SPYA	BRAF	FOLH1	EHF
PCK1	TMPRSS2	TRAM1	EHHADH
PIM1	EGOT	BRD4	EI24
CDK2	PRINS	FOS	EIF2AK2
GSK3B	SMKR1	FOSB	EIF3A
REG1A	RNY1	AMACR	EIF3H
RNASE4	EHBP1	ALOX12	ELAC2
PRKACA	LOC128667231	ALOX15	EMP1
THRB	CYP17A1	CTAG1A	EMP3
SSE1	FOLH1	MTOR	EMSY
ABO	HPCQTL19	ZBTB38	ENPP5
UCK2	HPCX2	GABPA	EPCAM
HSPA8	BCL2	GABRG3	EPHB2
HEXB	MYC	SPDEF	EPHX1
PAPSS1	KLK2	ARIH1	EPS8L3
THRA	CTNNB1	PART1	ERBB2
ABO	GSTP1	RNF19A	ERBB3
NT5M	PCAT19	SNED1	ERCC2
NMNAT3	VDR	POLDIP2	ERF
ABL1	EPCART	GATA2	ERG
GSR	HPCX	GATA3	ERP29
PLA2G2A	MDM2	GBAP1	ERP44
ERI1	STAT3	STEAP1	ESR1
PPP1CC	HIF1A	GHRH	ESR2
EIF4E	LNC-LBCS	GJA1	ETV1
HADH	IL6	B3GAT1	ETV3
RNASE2	ERBB2	DKK3	ETV4
RND3	CASP3	HPGDS	ETV5
Pfkfb1	DAB2IP	GLI1	EWSR1
MET	PCHILR	GNRH1	EZH2
EEA1	ACP3	ZMIZ1-AS1	EZR
RFK	SLC45A3	RASSF3	FAF2
TAP1	CCND1	TTC28-AS1	FASLG
GMPR2	IGF1	GPR42	FBLN1
ARL5A	BAX	GPX1	FBLN5
HNMT	E2F1	FLVCR1	FBRSL1
AK1	ESR1	SETD2	FBXO44
BCAT2	NKX3-1	NR3C1	FGF10
GSTZ1	PIK3CG	BABAM1	FGF2
SULT2B1	TGFB1	PYCARD	FGFR4
RAP2A	MTOR	CD274	FHIT
SULT2A1	MSH2	GRP	FOLH1
HSD17B1	PTGS2	GRPR	FOXA1
SPR	IGFBP3	GSK3B	FOXA3
FGFR2	CASP8	GSTM1	FOXC1
SEC14L2	ESR2	GSTM2	FOXO1
HDAC8	GSTM1	GSTP1	FOXP4
SOD2	CDKN1B	GSTT1	GADD45A
ITK	MAPK1	MSH6	GALNT3
BLVRB	RAD50	GRHL1	GCNT1
AURKA	CASP9	RMC1	GDF15
MTHFD1	PALB2	PSAT1	GGT1
TRAPPC3	CDKN1A	ANXA1	GHR
BIRC7	AMACR	ANXA2	GJA1
SRM	JUN	HDAC1	GNG5
KDR	SRD5A1	HGF	GNMT
FECH	EGF	HIF1A	GOLGA4
MAPKAPK2	HRAS	HMGB1	GPX3
LYZ	EZH2	HMOX1	GRB7
CRABP2	MMP9	FOXA1	GREB1
NR1H4	AKR1C3	APC	GRHPR
KAT2B	CYP1A1	HPN	GRPR
DOT1L	HPN	APEX1	GSK3B
PCTP	ETV1	HSD3B1	GSTA1
TTPA	MAPK8	HSPA4	GSTCD
MAPK14	RB1	HSPA5	GSTK1
PYGL	PIK3R1	XIAP	GSTM1
CDK7	PSCA	HSPB1	GSTM3
GSTA3	CYP19A1	HSPB2	GSTO1
SDS	PIM1	HSP90AA1	GSTP1
HAGH	MMP2	LINC00299	GSTT1
HPRT1	CDKN2A	PKD1L3	GSTT3
TRDMT1	IGF1R	IFI27	GUCD1
GSTA1	TRPM8	DUBR	H2BC8
DCPS	NR3C1	IFNG	H4C8
UAP1	SOD2	IGF1	HAO1
RAB9A	HSD3B1	IGF2	HAUS6
IVD	BMP6	IGFBP3	HBG1
CTSD	PARP1	APRT	HBG2
TRIM24	CDK1	TICAM2	HDAC6
NFKB1	ERBB3	IL1B	HERPUD1
STAT3	CHGA	IL4	HIF1A
CDK5	IL1B	IL6	HLA-DOA
KLF5	HGF	SHROOM2	HMGB2
MAOA	CHEK1	CXCL8	HMGN5
SLC2A1	HSD17B1	IL10	HMOX1
CSNK2B	RAD51C	AR	HNF1B
CDC25C	APC	ITGB7	HNRNPH1
APEX1	TNFSF10	ITGB8	HOXB13
GPBAR1	TNF	JUN	HOXB9
NR1I2	FOXO3	JUNB	HOXD3
ADAM10	CDK2	JUND	HPGD
PTGS1	NOS3	GSTK1	HPN
CHRNB4	BCL2L1	CD82	HRAS
CNR2	BIRC5	KCND3	HSD17B1
	BAD	KCNH1	HSD17B3
	CXCL8	KCNN3	HSD3B1
	GSK3B	MALAT1	HSD3B2
	XRCC1	KDR	HSP90AB1
	BARD1	KLK2	HSP90B1
	CAV1	KRAS	HSPA1A
	HSD3B2	AGMO	ICAM1
	MLH1	ARHGAP6	ID3
	PRUNE2	LEP	IDH1
	PMS2	LGALS3	IGF1
	MRE11	LMNA	IGF2R
	CDH3	LINC01194	IGFBP3
	CDK4	MIR141	IGFBP6
	CYP3A4	MIR143	IGFBP7
	PROS1	MIR145	IGSF5
	MAPK14	MIR146A	IL10
	MMP1	MIR15A	IL16
	SPINK1	MIR17	IL17RC
	GNRH1	MIR182	IL17RD
	SERPINE1	MIR183	IL18
	CYP1B1	MIR195	IL1RN
	FOXO1	MIR200C	IL2
	PLAU	MIR203A	IL24
	PRKD1	MIR204	IL27
	LOC111099027	MIR205	IL6
	LOC111099028	MIR21	IL6ST
	MAPK3	MIR221	INCENP
	KLK15	MIR224	INS
	NFKB1	MIR30D	INTS4
	SLC39A1	MIR34A	IRAK4
	SMAD3	MIR96	IRS1
	PPARG	EPCAM	ITGB3
	KDR	SMAD4	ITGB8
	NCOA4	STS	ITPR1
	CLU	MAOA	ITSN1
	TP63	LINC00595	ITSN2
	IL10	MBNL1	IVNS1ABP
	ALKBH3	MCAM	JADE2
	CTNNA1	MCL1	JAK1
	CD44	MDM2	JAK2
	FAS	MET	JAZF1
	CDKN3	MFAP1	JMJD6
	TNFRSF10B	MLH1	JUP
	SRC	MME	KAT6A
	SOX9	MMP2	KDELR1
	FGFR4	MMP3	KDM1A
	NDRG1	MMP9	KDM2A
	FOXA1	MMP14	KDM6A
	ITGA6	MRC1	KEAP1
	MAK	MSH2	KLF15
	PRKCE	MSR1	KLF6
	TSPY1	MST1	KLK2
	PTHLH	COX2	KLK3
	GDF15	MTHFR	KLK5
	OR51E2	MTX1	KLKP1
	IGF2	MUC1	KMT2A
	PRL	MYC	KMT2C
	CYCS	MYCN	KMT2D
	NFKBIA	MYO9B	KNL1
	CYP27B1	NBN	KRAS
	EIF4EBP1	NFE2L2	LAMB2
	GRP	NFKB1	LAMC1
	SHBG	NOS3	LARP4B
	TERT	NOTCH1	LCE2B
	GLI1	YBX1	LDAH
	FASN	NTS	LDHB
	PLK1	MIR375	LEP
	CXCR4	OGG1	LIFR
	ETV4	TNFRSF11B	LINC03103
	MKI67	PEBP1	LITAF
	SLC43A1	PCSK6	LMTK2
	KLK4	SERPINE1	LPAR1
	PRKDC	PCA3	LPL
	SST	PRKN	LRP1B
	RAF1	PAX9	LRP2
	PXN	TMED7	LZTS1
	TGFB1I1	WDPCP	M6PR
	NR1H2	PCNA	MACIR
	ELK1	KDM3B	MAD1L1
	TMEFF2	PEX14	MAP2K1
	CD164	ABCB1	MAP2K2
	SMARCA4	PIK3CA	MAP2K3
	UGT2B17	PIK3CB	MAP2K5
	HSD17B2	PIM1	MAP2K6
	FOS	PIK3CD	MAP3K1
	LEP	PIK3CG	MAP3K7
	FGF2	PITX2	MAPK3
	SPDEF	PLAG1	MAPK9
	SP1	PLAU	MATN4
	HSD17B3	PLK1	MBD1
	TPD52	CCHCR1	MBD2
	HSPA5	POU5F1	MBNL1
	UGT2B15	PPARG	MBTPS1
	MET	HAUS6	MC2R
	PTK2	SIDT1	MDM2
	TNFRSF11B	UHRF1BP1	MECOM
	IGF2R	RNF43	MED12
	SPP1	ACP3	MEIS1-AS3
	BID	SPATA6L	MET
	HSD17B4	GOLPH3L	MGA
	VIM	PTPA	MIF
	AGK	VPS53	MIR106A
	SMAD2	RNLS	MIR21
	TLR4	TRPV6	MLH1
	HDAC1	PRKAA1	MME
	PAGE4	PRKAA2	MMP13
	TUBB3	PRKAB1	MMP14
	VEGFA	CACNA2D3	MMP9
	JAK1	PAG1	MOB2
	IGFBP1	PRKD1	MPO
	CXCL12	MAPK1	MRE11A
	CYP24A1	MAPK3	MSH3
	TWIST1	MAPK8	MSMB
	RPTOR	PRL	MSR1
	RASSF1	PROS1	MT2A
	CYP3A5	SLC12A9	MTAP
	HSP90AA1	ACKR3	MTHFR
	ERCC2	PCBP4	MTOR
	NCOA2	KNL1	MUC4
	DNMT1	PSMD9	MXI1
	SKP2	ATP10A	MYBBP1A
	PGR	TTC7A	MYC
	PTK2B	PTEN	MYCL
	PCDH11Y	PTGFRN	MYH14
	EIF3H	PTGS2	MYO9B
	COMT	PTHLH	NAGK
	CCL2	PTK2	NAGLU
	TNFSF11	FBRSL1	NAT1
	INS	PTPRS	NAT2
	ALOX12	PVT1	NBN
	PLAUR	PXN	NCOA1
	STAT1	RAC1	NCOA2
	ITGB1	RAF1	NCOA3
	MUC1	RARB	NCOA7
	SERPINB5	CCND1	NCOR1
	ID1	OPN1LW	NDRG1
	CYP11A1	RELA	NDST2
	XIAP	ACTB	NDST4
	HSPB1	RNASEL	NEAT1
	TRPV6	ELAC2	NECTIN2
	RAD51	EEFSEC	NFE2L2
	EGR1	ROBO2	NFIC
	FN1	S100A9	NGFR
	MME	ATXN2	NIPAL3
	APAF1	BGLAP	NKX3-1
	PRKCA	CCL2	NOL8
	IGFBP2	CXCL12	NOS3
	LEF1	PKNOX2	NOX3
	CDC25A	PCGEM1	NPPA
	CRISP3	MS4A5	NPR3
	FGF8	POU5F1P3	NQO1
	PDS5B	POU5F1P4	NR3C1
	CCNB1	SHBG	NRP1
	YBX1	EBF2	NUCB2
	NCOA3	GORASP1	OACYLP
	RUNX2	TNS3	OGG1
	CDH2	BMI1	OLFM1
	RAP1A	RFX7	ONECUT2
	RNF14	SKP2	P4HB
	MMP7	WNK1	PAK6
	MAP2K1	SLC2A1	PALB2
	NOTCH1	SLC5A5	PAQR4
	GNRHR	SLC6A8	PARD3
	EP300	SLCO2A1	PARP1
	CFLAR	SNAI2	PATJ
	KLK10	SOD2	PAWR
	LGALS3	SOX2	PAX6
	TNFRSF10A	SOX4	PAX9
	BAK1	SOX9	PBSN
	STEAP2	SPARC	PCAT1
	SIRT1	SPINK1	PCDH11Y
	TGFA	SPP1	PCDH8
	PAK1	SRC	PDE4D
	IL6R	SRD5A2	PDHA1
	IRS1	BRCA1	PDIA3
	FGFR1	SRF	PDP1
	SERPINA3	SST	PDS5A
	EAF2	SSTR4	PDZK1
	PDPK1	ST14	PDZK1IP1
	SPRY1	STAT3	PENK
	CD36	STAT5A	PGAM2
	RELA	STAT5B	PGRMC1
	SPRY2	AURKA	PHGDH
	CREBBP	BRS3	PIGP
	STAT5A	BSG	PIK3CA
	ANXA2	ABCC8	PIK3CB
	WNT5A	SYT1	PIK3CD
	BMP4	KLF5	PIK3R1
	GRB2	TBX1	PIK3R2
	MCL1	ZEB1	PITX3
	SNAI2	TERT	PKNOX2
	EDN1	TFF3	PKP3
	STK11	TGFB1	PLAU
	GRB10	TGFBR2	PLAUR
	GLIPR1	THBS1	PLEK2
	GRPR	TIMP1	PML
	PCNA	TLR4	PMS1
	TRPS1	TMPRSS2	PODXL
	ALOX5	TNF	POLK
	VEGFC	TP53	PON1
	IL4	TPD52	POU2F2
	VAV3	CASC8	PPAP2A
	ZEB1	TWIST1	PPARA
	IFI27	CCR2	PPFIBP2
	PIK3CB	UGT2B15	PPL
	ETS1	UGT2B17	PPP2R2A
	MMP14	VDR	PPP3CA
	HDAC9	VEGFA	PRDX2
	CCL5	VEGFC	PRKACB
	NCOR2	VIM	PRKCZ
	SMAD4	VIP	PRKDC
	RHOA	WNT5A	PRNP
	SOX2	XRCC1	PRRX1
	SHC1	PCAP	PRSS8
	PRKD3	CXCR4	PSCA
	BMP2	CYREN	PSMC3IP
	STAT5B	GGCT	PTEN
	TP53AIP1	TRPM8	PTGS2
	NFE2L2	FSD1	PTHLH
	NQO1	MUL1	PTPRC
	ENO2	CALCA	PTPRK
	PDGFRB	AIMP2	PTRH2
	EDNRA	ZNF385D	PVR
	BMI1	SUGCT	PYHIN1
	STEAP3	MOB3B	QARS1
	KDM1A	CALCR	RAB4B
	RAC1	ATAT1	RAD23B
	CDK6	PSCA	RAF1
	ENG	NCOA4	RAG1
	MGMT	CALR	RALBP1
	BMP7	OR51E2	RASD1
	MIF	MOB2	RASSF3
	XRCC3	APOLD1	RB1
	INHA	TRIM8	REC8
	NGFR	NCOA3	RFK
	F2R	CASP3	RFX6
	GJA1	MAD1L1	RFX7
	PTPN11	FSD1L	RGMB
	SOS1	USHBP1	RHPN1-AS1
	PAWR	SPOP	RLIM
	CYP1A2	ARMC2	RLN2
	CREB1	CASP9	RN7SKP114
	FGFR2	CASR	RNASE4
	TCF7L2	CAT	RNASEL
	ETS2	TUBA1C	RNF130
	GAPDH	CBX4	RNF31
	CIP2A	SLC45A3	RNF43
	CDC25B	TANC1	RNLS
	PMAIP1	CAV1	RNU6-148P
	TGM4	RUNX2	RNU6-456P
	PSAP	TNFSF11	RNU6-491P
	CASP7	TP63	ROBO1
	REPS2	AKR1C3	ROBO2
	KRT18	DYNLL1	RPL10
	FGF7	VAMP8	RPL11
	PEBP1	TNFRSF25	RPL12
	BBC3	TNFSF10	RPN2
	CCND2	SUCLG2	RPRD2
	TIMP3	PROM1	RPS19
	KLK11	NR1I2	RRAS
	ABCG2	MBD2	RUNX1
	SETD2	CCND2	RXRA
	NCOR1	HSPB3	SAMD9
	NOG	SOCS3	SBP
	MAOA	MTA1	SCHLAP1
	TGFBR2	COL23A1	SDF2L1
	DNMT3B	LPAR2	SELENOP
	VIP	HTR3B	SELENOS
	TGFBR1	ZBED1	SENP6
	RARRES1	DLGAP2	SERINC3
	KAT5	NUMBL	SERPINA3
	ST14	DNER	SERPINB10
	SERPINB10	KLF4	SERPINE1
	FLT1	LONP1	SERPINF1
	RARB	ADIPOQ	SESN3
	KLF4	GRAP2	SETD2
	BGLAP	GDF15	SETDB1
	TIMP2	NPEPPS	SF3B1
	ANO7	HPCX	SHBG
	SERPINB6	CD44	SIL1
	CTNND1	KLK4	SIRT1
	ITGB3	HDAC9	SLC12A2
	PRAC1	FARP2	SLC22A3
	THBS1	CDH1	SLC26A4
	KLF5	CDK5	SLC31A1
	HMGB1	CENPF	SLC39A1
	SREBF1	CAMKK2	SLC4A2
	ABCB1	PSIP1	SLC5A5
	CCNA2	AZIN2	SLC6A20B
	JAK2	ADM	SLC7A1
	FASLG	CYP3A5	SMARCA1
	EPCAM	NQO1	SMARCAD1
	SOCS3	DNMT3B	SOD2
	GSTT1	AKT2	SOX2
	CDC25C	ETS2	SP5
	HSPA4	DKK1	SPATA18
	BMX	KDM1A	SPEN
	ANXA5	SMUG1	SPINK1
	ANXA1	TMEFF2	SPINK5
	CTSB	SENP1	SPOCK1
	SCAP	ANXA7	SPON2
	PIAS3	GADL1	SPOP
	NCOA1	IFNB1	SRD5A1
	ERCC1	CCN1	SRD5A2
	TIMP1	IL1A	SSBP2
	RELB	IL18	SSR2
	IBSP	ILK	SSX2
	MCAM	JAK2	ST14
	FKBP5	LCN2	STAB2
	ICAM1	MIR222	STARD10
	DKK1	MIR31	STARD3
	PSAT1	ASAH1	STAT3
	ENO1	MMP1	STEAP4
	IL1A	NGF	STMN1
	NTS	PAEP	STX4A
	EZR	PAWR	SUGCT
	PDK1	GDE1	SULT1A1
	LGALS1	MED15	SULT1E1
	DMTN	SERPINF1	SULT2A1
	FLT4	PGR	SULT2B1
	GHR	PKM	SURF4
	MAP2K2	PLG	TAF1L
	ODC1	PTOV1	TAP1
	ADAM9	KLK15	TBC1D2
	MAP2K4	EAF2	TBL1XR1
	BRIP1	AZGP1	TBX3
	BIRC3	RAD51	TBXAS1
	MMP3	RARRES1	TCEAL7
	ETV7	ROCK1	TCF4
	RASA1	ROS1	TCF7L2
	PTN	S100A8	TCN2
	NRP1	CCL5	TCP1
	LOX	MAP2K4	TERC
	PROM1	SREBF1	TERT
	CUL3	TGFB1I1	TET2
	ELOC	TGM4	TGFA
	APEX1	TIMP2	TGFB1
	LDHA	COL18A1	TGFBR2
	LPXN	NCOA1	THYN1
	TSG101	TNFRSF10B	TIMP4
	TOP2A	NRP1	TIRAP
	CHUK	CFLAR	TJP3
	POU5F1	SQSTM1	TLR4
	AKT2	MTDH	TLR5
	SHH	KDM4A	TLR6
	CCR5	SCHLAP1	TMEFF2
	CSNK2A1	CDK2	TMF1
	IGFBP7	NCOA2	TMOD1
	MIRLET7A1	KAT5	TMPRSS2
	ALPP	CKAP4	TMSB4X
	ITGA2	AGT	TNFRSF10A
	PRKCD	E2F3	TNFRSF21
	SQSTM1	EDN1	TNFSF10
	YY1	EIF4EBP1	TOM1L1
	LIMK1	ELK1	TOP2A
	ADRB2	ETS1	TOR1A
	TGFB2	ETV5	TP53
	TOP1	F3	TPBG
	CYP27A1	FKBP4	TPD52
	RPS6KB1	GNRHR	TPD52L1
	SREBF2	ICAM1	TPP1
	BIRC2	PWAR4	TPT1
	CDKN2B	IGFBP1	TRAF1
	NAB2	INSR	TRIM24
	PHB1	LOX	TRP63
	NTRK1	MIR193A	TRPM4
	RXRA	TACSTD2	TSHZ1
	NRG1	MIR29A	TST
	SSTR2	MIR301A	TTC28
	CDC6	MIR30C2	TTC9C
	CTNND2	MGMT	TXNDC5
	CYP2E1	MIR133B	TXNRD2
	LINC01672	NTSR1	TYMS
	IRS2	FOXP3	U2AF1
	AKR1C2	GOLM1	UCK2
	NPY	PHB	UCP3
	CCN1	PLA2G1B	UGT2B15
	ID4	PML	UGT2B17
	CCNG1	MAP2K7	UMPS
	AZGP1	CIP2A	UNC13D
	DPP4	RPE65	USO1
	LCN2	SATB1	USP28
	PIAS1	SDC1	USP7
	E2F3	SELENOP	UXT
	LPAR1	SGK1	VAV3
	FGF1	BMP6	VCP
	MIEN1	TGFA	VDR
	SPARC	TIMP3	VEGFA
	SPHK1	TP73	VIM
	ARNT	UVRAG	VIP
	FADD	YWHAZ	VPS52
	HSPA8	PDGFD	WAC
	CXCL1	CCK	WASF3
	MTHFR	F2RL3	WNT10B
	CDK5	GPRC5A	WNT4
	SEC14L2	AURKB	XPO1
	LYVE1	PTTG1	XRCC1
	ALOX15B	CDC6	ZBED1
	UBE2V1	CBR3-AS1	ZBTB16
	ITGB4	CDH11	ZBTB20
	CXCR2	CDK4	ZBTB7A
	TNFRSF11A	CDX2	ZFAND5
	PTGER4	POSTN	ZFHX3
	SFRP1	CTCF	ZFP36L2
	EDNRB	PPARGC1A	ZIC2
	CDC20	KLK11	ZMYM3
	HYAL1	SLCO2B1	ZNF160
	GHRHR	CTBP1	ZNF217
	KLK6	CTLA4	ZNF292
	TFF3	CTNND2	ZNF367
	SPINT1	PLB1
	IKBKB	OXER1
	FHL2	DLX1
	PMEPA1	DPYSL3
	RECK	JAG1
	SSTR5	F2R
	CSF2	FOLH1B
	NTSR1	NUP62
	FGFR3	IL27
	HBEGF	STEAP2
	ALCAM	GC
	ELAVL1	SLC39A1
	CTAG2	GTF2H1
	TUBB	TBX21
	TGIF1	HOXC6
	EEF1A1	HOXD3
	MAP3K7	HSD17B3
	JUND	HTC2
	ABCA1	IGFBP2
	WNT1	IGFBP7
	TLR9	FAS
	PTTG1	CXCR2
	TP73	IL15
	BNIP3	KRT18
	EIF4E	LGALS1
	RORA	MIRLET7C
	AREG	MIR100
	SLC2A1	MIR185
	ROCK1	MIR186
	SOCS1	MIR200B
	ABCC4	MIR210
	STK4	MIR212
	PDIA3	MIR23B
	PI16	MIR27A
	WNT3A	MIR30C1
	EPHA3	MIR34B
	ATF3	HPC3
	SLPI	MPO
	HDAC2	KLK14
	MMP13	ZFHX3
	TNK2	NME1
	DNMT3A	CCN3
	SSTR1	ODC1
	CDH11	PDCD1
	GHRH	PDGFRB
	PAX2	WWOX
	ERBB4	PIN1
	TAGLN	PMS2
	FLNA	TLR9
	CCND3	TRPM4
	MAP2K5	MIR449A
	PA2G4	AXL
	RUNX3	DCAF6
	BLM	PRKDC
	NPM1	MAPK7
	KAT2B	PSMA1
	IFNA1	PMEPA1
	AKT3	NDRG2
	PRLR	MIB1
	BCL2L11	RAD9A
	EPAS1	REN
	HSP90AB1	GAS5
	HNRNPK	BCR
	CD151	S100A4
	KRT8	SFRP1
	CXCL14	BMP2
	CALR	BMP7
	NME1	SNAI1
	CAV2	SP1
	PTGS1	STAT1
	CASP2	TGFB2
	GAS6	TLR3
	TNFRSF10D	NR2C2
	FHIT	TRAF6
	LMTK2	POTEF
	CCNE1	XPC
	BIN1	NANOG
	MCM7	ARHGAP24
	SAT1	TMPRSS13
	KLLN	ADAM9
	EPHA2	TNFRSF11A
	DUSP1	INPP4B
	CDH13	LMLN
	NTRK2	CDK1
	IFNG	SRA1
	VIPR1	HOTAIR
	ILK	SPRY2
	EPHB4	HPSE
	HSPA1A	UBE2C
	RALA	PRRT2
	MX1	CHUK
	CD24	CCR5
	ANXA3	CCR7
	MAPK7	CREB1
	DIABLO	CSTA
	TFAP2A	CYP2B6
	IGFBP5	TIMM8A
	STMN1	DUSP1
	GLO1	AGTR1
	CCNA1	ENO2
	CTRL	EPHA3
	NES	ERBB3
	HNF4A	ERCC5
	ADAM10	ESRRB
	FST	ALDH1A1
	SRY	FABP5
	BDNF	FGF7
	KRT5	FGFR3
	PPARA	FLT1
	BMPR2	SEC14L2
	MMP26	LPAR3
	ANPEP	ALOX15B
	TYR	GAPDH
	CTSD	SH2B1
	CHKA	GAS6
	DHRS9	GH1
	DDIT3	SLCO1B3
	CEACAM1	ANG
	CASP6	NEAT1
	TNFRSF10C	LYPD5
	OSM	GPX3
	MAPK9	CXCL1
	CA9	GTF2H2
	RPS6	ANXA5
	RHOC	HLA-A
	FLNB	HSD3B2
	LINC01194	ID1
	CXCR1	ID4
	ETV5	IDH1
	IL7	IL2
	STS	INHA
	KNG1	STMN1
	NTRK3	MIR152
	CD59	MIR20A
	CTSK	SMAD2
	ZBTB16	SMAD3
	ALOX15	KMT2A
	HNRNPA1	VN1R17P
	SFRP4	MIR331
	PRKAA2	MSH3
	BECN1	COX1
	RARS1	MTR
	IL24	ATF3
	CTAG1B	NKX3-1
	ALB	NOS2
	CD40	PNP
	ACP1	NTRK1
	MMP11	PRDX1
	CD9	DCTN4
	PBX1	LEF1
	ANGPT2	HSD17B7
	AXIN1	PGK1
	LYN	PLAT
	TUBA1B	PON1
	DUSP10	PPARA
	LOC117134611	PPP5C
	CDK7	IMPACT
	VCL	NLRP2
	CISH	PRKCA
	AKR1C4	PRKCB
	APOD	PKN1
	CDC42	TDRD1
	CDC37	PSAP
	AKR1C1	PAK6
	LOC130004273	CHPT1
	CERNA3	MIR193B
	CASC8	CXCL16
	MUTYH	LGR6
	LOC117134608	BDNF
	TMX2-CTNND1	CXCL5
	LOC117134604	CYP3A43
	LOC117135106	SOAT1
	LOC117135104	BRAF
	LOC117135105	STAT6
	TRIM68	STK11
	LOC126862571	TAC1
	KDM3A	TFF1
	ARLNC1	TGFBR1
	SYT7	TOP2A
	MAPT	TXN
	PARD3	BTG2
	MIR34C	HMGN5
	MSMP	CALM1
	JAZF1	CALM2
	SLC22A3	CALM3
	CTBP2	FZD4
	CASC19	UXT
	ZMAT3	SPHK1
	SHCBP1L	NAT1
	ATG13	XPR1
	NWD1	PAGE4
	FANCA	AKAP12
	AIFM1	NCOR2
	LRP1B	CD151
	HMGN2P46	ZEB2
	SNORD15A	LINC01672
	PPP2CA	COMMD3-BMI1
	DERPC	CDK9
	PITX2	TLR6
	CCAT1	FST
	ADIPOQ	CEACAM5
	MIR133B	SEMA3C
	SMARCC2	IFI44
	NAT2	TXNIP
	CASR	SUB1
	IRX5	PIM2
	LOC117134605	LOC110806263
	LOC117134606	CHKA
	LOC117134607	CHRM3
	IL1RN	H3P33
	KDM6A	ADCYAP1
	VCAN	MRGPRX3
	SMARCD1	MRGPRX4
	MAPK10	PRAP1
	LINC02605	GPR151
	MED1	OR51E1
	TBC1D3	VCAN
	PRAC2	CTSK
	ARID1A	CYP2D6
	PAK6	DAB2
	PAK4	DCN
	OGG1	AKR1C2
	SOD2-OT1	DDIT3
	BMPR1A	DDX5
	CADM3	ATN1
	ATR	E2F5
	RHEB	ABCA1
	DPYD	EDNRB
	SNAI1	EEF1A1
	GPX1	ELK4
	MACF1	PRSS55
	CASC21	ERCC1
	BDNF-AS	ALB
	COL1A1	ALKBH3
	SOX4	FER
	TGFBR3	ZHX2
	XPC	FKBP5
	CAND1	MMRN1
	YAP1	PEG10
	NOTCH3	FLNA
	SKIL	FLT4
	NUDT10	SRRM2
	URI1	ALOX5
	MYCBP2	KLK5
	NRAS	MRGPRX1
	TSC2	GLB1
	SCARNA5	PDCD4
	INTS6	RBMS3
	MAGI2	SGSM3
	MUC6	GPC1
	KDM5D	UTS2R
	PGR-AS1	ANGPT1
	SNORD44	ANGPT2
	TRA-TGC7-1	GPER1
	SLC30A2	GRN
	SOD1	CERS2
	ABCE1	H2AZ1
	CRP	HK2
	SGK3	HLA-DRB1
	AURKA	HMGA1
	RASAL2	HMMR
	ARHGEF26	HNRNPK
	STEAP4	HP
	PDZD2	HYAL1
	LAMA5	APOE
	TARP	IRS1
	MIR98	ITGAV
	CYSLTR1	KCNH2
	TUSC3	LEPR
	PKHD1	LRP1
	MIR146B	MIR126
	TRIM28	MIR130B
	CBX7	MIR139
	LINC-ROR	MIR150
	CAMK2N1	MIR154
	RAD51L3-RFFL	MIR155
	CPA4	MIR214
	MIR301B	MIR223
	ITGAV	MIR29B1
	KCNN3	MIR29B2
	FOXO4	MIR93
	TF	CD46
	LRP6	MDK
	PIK3R3	ABCC1
	SELENBP1	GPR166P
	BSG	MYH6
	HAGLR	NGFR
	TRRAP	NPY
	STAT6	NOTCH3
	KMT5A	NPAS2
	CD274	MIR378A
	ERCC4	PAK1
	RNU6-1	ANO7
	S100P	PAX2
	SCGB1D2	ADIPOR1
	SCGB1D1	PECAM1
	CALCA	PIK3R1
	PRDX3	PLA2G2A
	MYLK	IL17D
	NEK9	UGT1A1
	LCOR	MED1
	YTHDC2	TET2
	TOPORS	TRPM7
	SNHG33	TUG1
	TRC-GCA24-1	PPT1
	BRD4	KDM3A
	TRPC1	PNO1
	PWAR1	PTBP1
	SUFU	PTGS1
	SMARCC1	PTK6
	ATP1A1	BAX
	LRP1	REST
	MTA1	BLM
	NAT1	SET
	IFIH1	SIAH2
	DOCK2	SLPI
	MYO18A	SMARCA4
	SSBP2	SOD1
	MIR93	SRD5A1
	CREB3L4	SRY
	KLHL20	SSTR2
	TLR6	SULT1E1
	MIR335	SULT2A1
	CHGB	THY1
	KDM4B	TPT1
	USF2	NR1H2
	SLC2A4RG	XRCC3
	ADRM1	CA9
	WWC3	WDR77
	SELENOP	NOX5
	KIR3DL1	TFPI2
	COG1	CD276
	SEZ6L	HMGA2
	LRRC56	MLRL
	KIF16B	USP9X
	SCRN1	CASP1
	KPRP	CASP7
	VCAN-AS1	NR0B2
	CACNA1D	RECK
	GPR31	PROK1
	TSC1	MAK16
	AHR	RUNX3
	NOS2	SOCS1
	SDC1	IRS2
	TCHP	EIF3H
	CHD1	TNFRSF10A
	MIR409	TRIM24
	LOC127407129	SOCS2
	RICTOR	ARHGEF7
	ITGB6	CCNB1
	CD2AP	CD163
	DNAH8	ABCG2
	USH2A	GREB1
	CAPN6	CDC25C
	ENTPD3-AS1	MIR708
	ARHGEF15	HDAC6
	XRCC6	TSPY10
	GREM1	HOTTIP
	F2	MIR466
	TNFRSF8	TNK2
	PTPN3	PCAT14
	EIF4G3	SPRY1
	ING4	ABCC4
	LOC130059290	PAK4
	CDYL2	CDKN3
	MIR18A	DLC1
	NF1	PRMT5
	DDB2	OLFM4
	ULK1	CXCL13
	MTR	TXNRD2
	SCNN1A	CFL1
	SLC5A2	CFTR
	CHD2	LYVE1
	RCC2	FSTL1
	SF3B3	CISH
	TBC1D3B	SERPINA3
	PRPF8	CNR1
	ARMC12	CPT1A
	RB1CC1	CSF1R
	SNHG7	PWAR1
	CASK	PDIK1L
	GUSB	CTSD
	COL5A1	CTSZ
	PLCB4	ADRB2
	PTPRN2	CYP1A2
	SLC5A7	CYP2E1
	KCNQ5	CYP11A1
	DNAJC3	PRUNE2
	PSMC1	CYP27A1
	DYM	DAG1
	HPS3	DCC
	ERBIN	GADD45A
	INTS8	DEFB1
	PHF2	DSPP
	NEMF	ECE1
	DOCK5	A2M
	BABAM2	ENG
	SGSM2	EPHX1
	INTS3	EPO
	LMLN	ACSL3
	HEBP2	FAP
	PLEKHG4B	FGF1
	CPSF7	FGF13
	ANKRD12	FHL2
	PRH1	ELL2
	LOC105375751	KDM4B
	IL2	FLI1
	PPARGC1A	PHLPP1
	MIR373	FTH1
	DOCK1	ALPP
	CAT	XRCC6
	WDR77	TNFAIP8
	ALDH1A1	NOC2L
	MIR451A	EHF
	TRIP12	GBX2
	FAM13C	AMELX
	SYP	GHR
	HMOX1	FOXP1
	IGSF8	GNMT
	MTRR	GLO1
	GC	GLS
	STEAP1	GNAS
	SPANXD	CXCR3
	RCN1	CTBP1-AS
	GPR68	GIT1
	BTNL2	NOB1
	TBC1D3C	GSN
	TBC1D3F	HADHB
	TBC1D3D	HDAC2
	RAC2	ANXA6
	GRM8	HIC1
	PDK4	AOX1
	ULK2	HNF4A
	INMT	HOXC8
	PYHIN1	HPRT1
	INMT-MINDY4	HSPD1
	MIR200C	HSPG2
	HOXB9	ICA1
	OLA1	IL7
	POLN	AQP3
	TLR10	IL17A
	TLR1	ITGB1
	ZNF280B	KLK1
	MIR204	LDHA
	COL18A1	LGALS8
	ZMYND8	MIRLET7B
	S100A8	MIR106A
	CRK	MIR107
	DLAT	MIR130A
	TRPC4	MIR132
	AKAP1	MIR148A
	ABCG4	MIR16-1
	IL33	MIR191
	DPPA4	MIR199A1
	NEDD8-MDP1	MIR199A2
	LOC108021846	MIR19A
	SLC5A8	MIR200A
	CYS1	MIR22
	AGER	MIR23A
	USP7	MIR26B
	COX6C	MIR27B
	ACE	MIR32
	HSD17B7	MIR320A
	FANCC	MIR99A
	GLI2	ARRB2
	LOC110408762	MECP2
	LEPR	MIF
	ATF1	MMP13
	PWAR4	MMP16
	CCAR1	MRE11
	MIR193A	KLK12
	IL18	MST1R
	MIR185	MT2A
	MIR543	MXI1
	LRATD2	NFATC1
	MYO6	NPM1
	LOXL1-AS1	NUCB2
	LCP1	OSM
	NLRP1	P2RX7
	AGR2	PA2G4
	SENP1	NUSAP1
	ESRRB	MZB1
	GOLM1	TNFRSF12A
	TYMS	ZBTB7A
	TIMELESS	MPC1
	MIR152	PIK3R2
	XRCC2	PKD1
	TNS4	POLB
	GREB1	ING3
	CYP2D6	PPARD
	MIR187	XAF1
	PKM	ADI1
	TRGC1	LGR4
	SOD3	PBK
	MIR301A	PRKCZ
	MIR494	MAP2K5
	XRCC5	PRLR
	LOC654780	LGMN
	PON1	KLK10
	GSTA1	MIR499A
	MSH3	WFDC1
	NTHL1	RAC3
	PKIB	RAP1A
	SULT1A1	RASGRF1
	ANXA7	RBM3
	HCCAT5	MBOAT4
	PIK3R2	RRAS
	MAPKAP1	SCD
	SESN3	CEACAM1
	INHBA	CX3CL1
	FOXM1	SELE
	GATA2	SFRP4
	XRCC4	SIM2
	CLDN7	UCA1
	RAD52	SOD3
	RET	SOS1
	PRKAA1	SPG7
	MIR499A	SPOCK1
	BCAR1	SREBF2
	MIR1-1	SSTR1
	MEN1	SSX2
	KAT7	SULT1A1
	CLPTM1L	ADAM17
	MT2A	BTF3P11
	PATE1	PRDX2
	KLK5	TFPI
	HSPD1	TGFB3
	MPO	TGM2
	RDH11	TSPO
	AURKB	TLR1
	TLR3	TP53BP1
	BICRAL	CRISP2
	MIR124-3	TSG101
	RAD51B	TSPY1
	RAD9A	TSPY3
	GPER1	UBE3A
	GNAS	TRPV1
	RNASE1	WNT11
	TNRC6B	XPO1
	CDK12	ZFP36
	NUDT11	USP7
	SRF	SLC52A2
	NPAS2	STEAP4
	MAP3K1	LIN28A
	MYCN	DHDDS
	METTL3	FOSL1
	SYNPO2	SETD7
	RAPH1	SLC7A5
	ADAM17	KDM5D
	CYP3A43	CAPZB
	TYMP	SESN2
	CFTR	MIEN1
	ACTL6A	PRAC1
	LTA	SRRM4
	CHTF8	SPZ1
	POMC	HAVCR2
	S100A9	SLC43A1
	SEMA4F	PIAS1
	C5	PDLIM4
	GPRC6A	RUNX1
	PRKAB1	CDK5R1
	DDX5	CCNA1
	ADIPOR1	RGN
	CTCF	SLC16A4
	TPT1	SLC16A3
	FABP5	NOG
	LHB	CLOCK
	NGF	CD40
	PNLIPRP1	CD40LG
	MIR7-3HG	MTSS1
	LIG4	MED12
	HDAC3	CDH2
	NCL	AKT3
	GNPAT	MIR888
	HIRA	MIR1301
	VNN2	PARP2
	TSHZ3	MIR2909
	SERPINB4	HUWE1
	AHRR	LINC-ROR
	PALM2AKAP2	PGR-AS1
	TSNAXIP1	TRAP1
	TMEM147-AS1	RBM5
	NR2C2	ADAM10
	PLA2G2A	TRIM13
	PER1	CDK7
	MIR139	TRIB1
	LINC00844	CDK8
	GCNT1	CDK2AP2
	CDH5	CDKN2B
	CADM1	LANCL1
	CHD3	AKR1A1
	SNORD43	TUBB3
	ARID1B	CAP1
	RNF43	CARM1
	ATRX	CEBPB
	PECAM1	GNA13
	CCN3	POLD3
	YWHAZ	PTGES3
	MIR19A	PLAC1
	MTHFD1	LILRB1
	WWOX	SMR3B
	ASAH1	GADD45G
	MIR378A	PRDX3
	SMARCD2	TMED10
	ID3	WWP1
	KRT1	WDR5
	SI	RPP14
	CNTFR	ZWINT
	LRPAP1	CDC37
	PTPRD	PTP4A3
	ATP6V0A1	CHI3L1
	ALDH9A1	BAZ2A
	CHAF1B	LINC02605
	GPR55	PARK7
	KRT9	CBX3
	MAML1	H3P8
	USP48	H3P17
	EXOC2	ARL11
	HMCN1	AGAP2
	NAPB	DCD
	USP28	H4-16
	FREM2	CCR4
	NELL1	CCR6
	OXA1L	MAP3K8
	CKAP5	COX8A
	PREX2	CLDN4
	SIGLEC6	CLDN3
	BLTP2	CLDN7
	KDM6B	CPOX
	TTLL12	CPT2
	HMGN5	CRAT
	MIR130B	ATF2
	GNMT	ZBTB46
	MACROD1	NKX2-5
	HMGA2	CTRL
	THADA	CXADR
	CASP1	SLC2A12
	AXIN2	DDC
	MIR379	AGER
	AGR3	DPEP1
	MST1R	DPP4
	SIAH2	LPAR1
	SNHG12	CADM4
	CEACAM3	CRYBG1
	MITF	EPAS1
	MCM2	EPHB4
	NANOG	EPOR
	MIR663A	ESRRA
	NEDD4L	ETV6
	CCR2	ALCAM
	EN2	F2RL1
	SNORD95	FABP4
	MDM4	SPATA19
	XAGE1B	ALDH1A3
	XAGE1A	EFEMP1
	COX5A	FDPS
	EHF	FOXC1
	DDR1	TPX2
	PKN1	FOXC2
	ACKR3	KDM4C
	CEP290	PHF8
	PCDH11X	PPP1R13B
	CFAP298	CBX5
	TBC1D3I	ALPI
	LINC01509	FUS
	TBC1D3E	FUT4
	RPL13	RICTOR
	MECP2	FYN
	DAB2	GNL3
	FOXP4	LATS2
	MIR17HG	GDF2
	FANCD2	GDNF
	HNRNPU	GFI1
	PRSS1	GHSR
	TH	NOX1
	SNHG17	LAT
	PAGE1	PELP1
	MIR200A	AGO2
	MT-CO1	BHLHE22
	TLR5	ABO
	MBD2	CAVIN1
	EEF1A2	TMED10P1
	KLKP1	TRIM59
	KIT	LAMTOR2
	JUP	MYLIP
	F2RL1	RACGAP1
	GRIN1	UHRF1
	STXBP1	GSTA1
	GPHN	GSTM3
	KCNJ1	H1-0
	ABCA3	H2AX
	ALDH5A1	ANXA3
	F5	HDGF
	GABRB2	ACACA
	KCNQ3	HMGCR
	PDE3A	NR4A1
	SLC6A9	FOXA2
	PDE6B	HOXA10
	DLL1	HOXA13
	FPR1	HES1
	AP3B1	HSD17B2
	CD2	HSF1
	HTR2C	BIRC5
	KIF5A	TNC
	AGPAT2	IAPP
	ATP2B4	IFNA1
	C3AR1	IFNA13
	CD244	IGF2R
	CNGA1	IL2RA
	CORIN	FASLG
	CPA6	IL2RB
	EYA1	IL11
	MYH3	IL13
	MYOCD	IL16
	SLC34A1	IDO1
	TG	ITGA6
	ASIC2	ISG20
	DNAJC6	ITGA5
	ENTPD3	ITK
	SLC16A2	KCNMA1
	TRIM5	KISS1
	CRX	KIT
	FBN2	KIF22
	GFRA3	KMT5A
	GRID1	KRT19
	KCNJ4	RND3
	MCC	LAMP2
	PKD2L1	RPSA
	SLC13A3	LASP1
	SLC25A32	LGALS3BP
	TRPM3	LIFR
	ADAMTS3	LIG4
	CABIN1	LIMK1
	CTSE	LMO2
	DEAF1	FENDRR
	GAPDHS	LPA
	HTR5A	LPL
	MYO1A	LRP5
	MYOT	ARNT
	NLRP7	MIR125A
	PDE1C	MIR137
	PPP2R5C	MIR188
	PRPH2	MIR192
	RHOBTB2	MIR198
	SLC25A22	MIR206
	TEX14	ARR3
	THBS3	MIR30A
	CERS3	MIR33A
	GNGT1	MIR17HG
	PPIP5K2	SMAD1
	SCUBE3	SMAD7
	SKIC3	MAGEA3
	SLC35C1	MAZ
	SLC8A3	MCM7
	SORBS1	MEIS1
	SORCS1	MEIS2
	SPECC1L	MAP3K1
	SYNGR1	MIAT
	UVRAG	MIR330
	ARAP3	MIR335
	ATL3	MIR338
	CADPS	MT1A
	CBY1	ATP6
	GET3	PPP1R12A
	IBTK	NCAM1
	IFT43	ACLY
	IMPG2	DRG1
	RLIM	NEDD4
	SYCP2	NF2
	DHX29	NHS
	DSCAML1	NTRK2
	ENPP7	MIR361
	MYH8	MIR381
	PPP1R3C	MIR424
	SV2B	MIR425
	ZDHHC8	OLR1
	ASPRV1	ALDH7A1
	CRTC3	PBX1
	CSMD2	PCBP1
	CTRB1	NDUFA13
	DDX50	ING4
	DIS3L	SLC45A2
	DNAH9	LINC00328
	EMILIN1	ERGIC2
	GABRG1	SCARA3
	KATNAL2	PDGFRA
	KCNF1	PDHA1
	LONP2	SF3B6
	MYRF	ENPP1
	PCDHA3	GHRL
	PDP2	PER1
	PPP6R2	PGF
	RPS6KC1	PITX1
	SAFB2	PKD3
	SERPINB13	PLA2G4A
	SMUG1	PLAUR
	CFAP65	PLCL1
	EPSTI1	SERPINF2
	GDF10	PLXNB1
	HLF	PMAIP1
	ITGAD	XRN1
	ITIH5	UGT2B28
	KIF12	DDX56
	KIR2DL3	PPP1R12C
	MAMLD1	TRIM68
	NECAP2	PPP2CA
	NHS	MEG3
	NMD3	H4C15
	PDE7B	CAMK2N1
	PIGH	HES6
	PLB1	TRIM36
	RAB33A	PRG2
	RPL10L	PRKAR1A
	S100A3	MYDGF
	STX8	MAPK9
	TAOK3	KLK6
	TMEM230	B2M
	TMEM94	PLAAT1
	VKORC1L1	PSMD7
	ADAT1	DANCR
	ARPP21	MIR452
	BRF2	MIR409
	COPS6	MIR146B
	CTTNBP2	MIR500A
	DHDH	GATAD2B
	DPH7	KIDINS220
	GRWD1	PTPN1
	MAMDC2	PTPN6
	NETO2	PTPN7
	NTN4	SUGP1
	OLFML3	HAMP
	PCDHA9	CCDC181
	PLEKHG1	ZNF410
	PODN	PTPRF
	PPRC1	PYCR1
	PYCR3	RAN
	SLC46A3	RARA
	TSPAN5	RB1
	ZKSCAN1	PBOV1
	ZNF224	RBP1
	ANO9	BCL2L1
	ARHGEF25	RING1
	CDKN2AIP	SNORD15A
	COL24A1	RPL19
	DDX60	MIR483
	DGCR6L	MIR455
	ENOX1	RPS6KB1
	FBXL5	RRAD
	LMAN1L	RREB1
	PCDHB1	RRM2
	PGPEP1	SORT1
	PRSS22	VPS52
	PTPN21	TP53AIP1
	RAB11FIP4	GOLPH3
	RBAK	SFRP5
	SDK1	CXCR5
	SLC25A47	TTTY15
	UMODL1	SHH
	UNC79	SHOX2
	ABCF3	SMYD3
	ACRV1	BMP1
	AGBL4	BMP4
	B3GALT1	CXADRP1
	C2CD6	SLC7A1
	CFAP43	SMARCA1
	CHAC1	FSCN1
	FBH1	SRM
	KRT33A	SRPK1
	MUC17	ST13
	MYO16	STC1
	PCDHA7	SYP
	RUBCNL	MAP3K7
	SBNO1	HNF1A
	TMCO5A	TCF3
	URB2	MIR574
	ARHGEF40	MIR615
	BEND5	BTK
	DCHS2	TEAD1
	DNAH3	TEK
	FAXC	TERF2
	FGD2	TFAP2A
	HEPACAM2	TFRC
	KNTC1	THBS2
	MRPL46	TRAF2
	MXRA5	TRPM2
	PCDHA10	TRPS1
	PCDHA2	TXNRD1
	PCNX1	TYR
	RAPGEFL1	VPS51
	RPUSD1	VCL
	SPATA18	VCP
	ZNF136	EZR
	ZNF184	VIPR1
	ZP4	VTN
	ZSCAN2	NSD2
	ARHGAP20	WNT1
	MTBP	XRCC4
	PCDHA1	ZNF217
	BTBD16	PRDM2
	CHIC1	DDR1
	HHIPL1	FZD5
	LARP1B	CAD
	MTNAP1	PALB2
	OIT3	CAMKMT
	PLEKHA4	CMIP
	RUNDC1	TLR10
	TRIML1	CAPG
	ZNF431	CAPN2
	EFCAB6	H4C9
	ELOA2	AXIN2
	ENTREP1	FZD8
	FHIP1B	NUF2
	GPR26	H4C1
	HIPK4	SOX7
	LRRC37A3	H4C4
	PCDHA5	H4C6
	PCDHA6	H4C12
	RERGL	H4C11
	ST8SIA6	H4C3
	TAS2R20	H4C8
	ZNF100	H4C2
	DDX60L	H4C5
	DGAT2L6	H4C13
	FAM83C	H4C14
	OR5L1	ITCH
	OR6K2	PLA2G6
	PCDHA4	PLA2G10
	PCDHA8	BRIP1
	SLC35G1	SPARCL1
	TRIM34	MAGT1
	WDR49	KAT8
	ZNF287	TCHP
	ZNF772	LZTS2
	CCDC171	CUL4B
	ITPRIPL1	CUL4A
	MDP1	SNORD35B
	RIPOR3	IL17RC
	ZNF419	ORAI1
	ABTB3	SNORD14B
	GPR82	SNORD14C
	IRGQ	SNORD14D
	KIAA1755	SNORD14E
	OR4C12	ZIC5
	ZNF48	BHLHE40
	ZNF560	HSD17B6
	TMEM183A	PDE5A
	BNIP5	RIPK1
	OR1S2	ADAM15
	OR2Z1	KRIT1
	OR5AC2	BCL10
	ZNF304	WASF1
	ZNF717	SPAG9
	ZNF776	SLC7A7
	OR14A16	SLC7A6
	OR2T1	USP2
	OR8K3	CBFA2T2
	ZNF534	EXO1
	SPECC1L-ADORA2A	ARHGEF2
	ARFGEF1-DT	SLC33A1
	C8orf44-SGK3	PPIG
	MYHAS	COX5A
	PKD2L2-DT	LPXN
	RBAK-RBAKDN	ONECUT2
	HIF1A-AS3	CD38
	USH2A-AS2	PTGES
	CCNO-DT	CXCL14
	PCDHA@	CD47
	WDFY3-AS1	CD59
	CRTC3-AS1	CD63
	HTR5A-AS1	PCLAF
	ARHGAP44-AS1	MAGI2
	LOC101927157	TLK1
	ZNF225-AS1	G3BP2
	B3GALT1-AS1	NR1I3
	PCDHB1-AS1	CDH3
	PDCD6-AHRR	VTRNA2-1
	THBS3-AS1	MIR875
	PCDHB@	MIR744
	LOC126806658	MIR374B
	PRH1-PRR4	MIR301B
	LOC101928034	MIR543
	PRH1-TAS2R14	LOXL1-AS1
	LOC130004274	MIR1266
	LOC126862505	MIR1271
	LOC121366038	H3P41
	LOC122757966	MIR3622A
	LOC126653361	PCAT6
	LOC126806265	CCAT1
	LOC126861022	MICA
	LOC126861231	DNM1L
	LOC126862945	MIR4534
	LOC126863302	NR1H3
	LOC129936904	TSPAN1
	LOC130005185	RAD50
	AOPEP	KIF20A
	RREB1	OPTN
	GAGE7	G3BP1
	BMPR1B	TRIM28
	EPHX1	DHRS9
	STUB1	TRPM2-AS
	BTRC	RNF41
	FANCG	AK6
	EMSLR	CTDSPL
	TRE-TTC3-1	RABEPK
	MLST8	RAMP1
	SMARCD3	STUB1
	H2AX	TP53COR1
	PTOV1	MAEA
	POLD1	APC2
	PURA	APBB3
	MIR218-1	PCAT2
	GH1	CNPY2
	ERCC3	KLF2
	LOC106128905	SEMA3A
	FOXP1	TUBA1B
	PRKCZ	PIAS3
	CXCR6	PCAT29
	MIR452	ECI2
	MAP3K6	CLEC10A
	AFA1	SEC23A
	UBE3A	CEBPA
	TXN	MYBBP1A
	CBX1	CEBPD
	POTED	ATG7
	MIR212	PCSEAT
	BUB1B	PRDX4
	FGF23	PAICS
	HPGD	HEXIM1
	EPOR	NPRL2
	PKD1	CETN1
	DKK3	KDM5B
	RASA2	IQGAP2
	SRRM1P1	SEPTIN9
	ABCC1	CCR9
	UHRF1	CGA
	MIR150	WASF3
	MIR186	NEU3
	FANCI	PPP1R13L
	RACK1	BTG3
	PODXL	SNORD138
	CXCL16	STIP1
	ACTL6B	EBNA1BP2
	TNC	IMMT
	SNORD24	TMSB15A
	TET2	LOC110351180
	UBE2D1	MNS16A
	MIR155	ESM1
	SHMT1	CHEK1
	INSR	PTPRT
	PRKCI	LZTS1
	ESRRA	PTENP1
	SORT1	CHRM1
	SLCO1B3	STK38
	MCM3AP-AS1	ACOT7
	TP53BP1	MGLL
	MIR192	H3P28
	CSNK1E	H3P40
	TBL1XR1	WDFY2
	HMMR	BATF2
	MC1R	ANIB1
	CUL1	ADCYAP1R1
	RBX1	TWIST2
	SNORA66	LARGE2
	SIAH1	CMA1
	RAPGEF1	CANT1
	CTBP1	PLK3
	MTDH	COMP
	ATP5F1A	EMB
	SATB1	VPS37A
	SLCO2B1	CRMP1
	SERPINA2	CRY1
	WRN	CRY2
	AGTR1	CRYGD
	GPX4	CRYZ
	FH	CSF1
	MIR1207	CSH1
	CNR1	CSH2
	PML	CSNK1E
	ASCL1	CSNK2A2
	PSIP1	NRG4
	HOXA11-AS	CSRP1
	MIR34B	LYPD4
	CALCR	CREB3L4
	FSHR	CCN2
	ZBTB7A	CTSL
	PYCARD	CUX1
	MIR501	CX3CR1
	VPS9D1-AS1	PAQR3
	LOC110806263	KLB
	HNRNPA2B1	AGR3
	HLA-A	GRK3
	MIR135A1	LRATD2
	LINC00665	MAGEB6
	SLC19A1	SLC5A8
	B2M	DAPK3
	SELENOF	TMPRSS6
	CERS4	DHX15
	RECQL4	ZNF92
	FTO	DKC1
	GSTM3	AFP
	TRIM24	DMBT1
	PTCH1	SARDH
	F3	DNMT3A
	POLE	DNTT
	SFN	DRD2
	EPO	DSG2
	EWSR1	HBEGF
	HSPG2	DUSP2
	DAXX	DVL3
	POSTN	AGTR2
	G3BP1	E2F4
	OR51E1	EEF1B2P2
	EXO1	EGR3
	HP	EPHA2
	CX3CR1	SERPINB1
	GPT	MARK2
	RFX6	EMP1
	CDCP1	CTTN
	CD34	ENO1
	CXCR5	EP300
	MIR128-2	EPHA7
	APOE	ERBB4
	PCBP2	ERCC6
	CEBPB	ESRRG
	SOCS2	EVX1
	SRRM4	EWSR1
	MIR455	F13A1
	ACTC1	ACSL4
	PRKCG	FBLN1
	AXL	USP12
	ANG	MED19
	LPAR3	VWCE
	DEK	HEPACAM
	MIR128-1	ZUP1
	MIR24-1	FCGR3A
	TTTY15	FOXK1
	TPCN2	FECH
	ERCC5	FGF9
	FER	FH
	FSCN1	VASH1
	MED19	MLXIP
	MIR30D	ATF6
	TTPA	RAB3GAP1
	CD276	CDK19
	KLK7	SARM1
	CXCL5	KDM6B
	ACP4	FLII
	ELAC1	FLNC
	PER3	ATG4B
	UBE2C	NBEAL2
	ZFP36	WWC1
	MIR92A1	FMOD
	GFI1	SIRT3
	PRKCB	ANGPTL2
	PTK6	HEY1
	CRKL	CBX7
	CPN1	TRIM29
	GAB1	GABARAPL1
	MAP4K1	IL17RA
	RAP1B	KIF4A
	TFEB	IFIT5
	F13B	FRA7G
	PERP	FRK
	NOXA1	ABL1
	SHISA5	FTL
	EI24	FUT1
	MIR548B	FUT8
	MIR1305	RASGRP3
	MIR548C	ASPM
	MIR4482	WWTR1
	MIR4491	LRIG1
	PRKACA	GLCE
	ALK	APPL1
	IL6ST	AMD1
	FUS	GATA1
	MIR154	FBXO8
	SSTR5-AS1	ARFGAP3
	SSX2	HSPB8
	PIN1	NUPR1
	SULT2B1	NR6A1
	IGF2BP2	GCNT1
	IRX4	INTS6
	UBE2I	GDF9
	VCAM1	GEM
	ARRB1	AMH
	SSTR3	GHRHR
	IL17RD	HBP1
	MIR425	PABPC1
	FOXA2	SIGLEC7
	NSMCE2	SND1
	LOC110366354	GJB2
	WT1	TSPAN13
	CAVIN1	BBC3
	ADIPOR2	SRPX2
	STC2	GCLC
	CASC17	RABGEF1
	CALM2P1	MCAT
	PRDX1	GLI2
	PPP2R2A	GLP1R
	TRPM4	GLUL
	OGT	GNRH2
	SNHG16	GPLD1
	LINC00992	H19
	KLK14	HMGN2P46
	ASAH2	TMSB15B
	MIR26A1	GPX2
	ITGA5	GPX4
	NFATC1	GRB10
	CYP2B6	MCTS1
	USP14	ATAD2
	SPINT2	UBE2T
	NDRG2	GRM1
	MIR519D	CXCL3
	CSF1R	PDIA3
	GHRL	GUSB
	ACVR1	OBP2A
	BIK	SPANXA1
	ANP32D	GZMB
	MIR381	HAGH
	MIR103A2	HADHA
	LPL	HCLS1
	FOSL1	HCRT
	PLXNB1	CFHR1
	ACSL3	HGFAC
	IL13RA2	HIP1
	ROCR	MNX1
	MDC1	HMGB2
	RRM2	HMGCS2
	IRAK4	APAF1
	IRAK1	HNRNPA1
	GUCY1A1	HNRNPL
	MIR211	HPR
	ACVR2A	HRAS
	ATG7	AGFG1
	MIR134	HSD17B1
	PDE4D	HSD17B4
	KLK1	HSPA1A
	HUWE1	HSPA1B
	NONO	HSPA1L
	INF2	HSPA8
	OXER1	IARS1
	MIR193B	FFAR4
	MIR1271	ARMH1
	ZNF652	IFI16
	CD99	ACTBL2
	SEMA3A	IGFBP5
	MLXIPL	IGHG1
	AMD1	APP
	HNRNPH1	RBPJ
	HEPACAM	IKBKB
	MIR124-1	IL1RN
	MIR3622A	IL4R
	KCNMA1	IL5
	NR2F2	CXCR1
	TCF3	IL9
	PTP4A2	AQP1
	MIR133A1	IL11RA
	MIR20B	IL12A
	TRAF2	IL13RA2
	TFF1	PRAC2
	SERPINF1	AQP5
	ECE1	ING1
	GNL3	INSRR
	IL32	AQP9
	CHKB-CPT1B	IRF6
	FYN	ITGA2
	ITCH	ITGA3
	CAMKK2	ITGA9
	IGFALS	ITGAM
	PDCD4	ITPR1
	CRY2	ITPR3
	SEMA3B	JAK1
	WWTR1	TRIM23
	PDLIM5	AREG
	PMS1	KCNK2
	SMAD1	KIF2A
	WWP1	KIFC1
	IL13	ARG2
	PCSK6	KRT13
	SOST	SAP30L-AS1
	RING1	RHOA
	ALPL	NANOGP8
	ATF6	VGLL3
	NSD2	LIN28B
	ANP32CP	LAMB3
	NQO2	LAMC1
	F7	LAMP1
	HPSE	LBR
	IDH1	LCK
	KEAP1	LDHB
	TLE3	LDLR
	SSTR4	LIF
	S100B	LOXL2
	SCG5	CYP4F3
	SCGB2A1	ARNTL
	TCAF1	MIR106B
	TCAF2	MIR122
	CBL	MIR140
	FLI1	MIR144
	MYH11	MIR15B
	IGFBP6	MIR18A
	MIR30C2	MIR187
	ATP8B1	MIR25
	PARK7	MIR28
	NTF3	MIR296
	PRMT5	MIR29C
	BIRC7	MIR302A
	MICAL2	MIR30E
[truncated: 6,953 more rows]

## Sheet: S3_x0009_
			IDENTIFIER	METHOD
	non mutant	AKT1	4GV1	X-ray
	mutant	AKT1	3QKM	X-ray
	non mutant	PIK3CA	4L23	X-ray
	mutant	PIK3CA	4JPS	X-ray
The docking grid parameters for AKT1 and PIK3CA
		Vina score	Cavity size	Center			Size
AKT1				x	y	z	x	y	z
	4GV1-mol1	-7.4	601	-21	7	12	19	19	19
	4GV1-mol2	-7.6	418	-19	-2	14	20	20	20
	4GV1-mol3	-7.7	418	-19	-2	14	21	21	21
	3QKM-mol1	-7.1	818	26	7	12	19	19	19
	3QKM-mol2	-7.1	818	26	7	12	20	20	20
	3QKM-mol3	-7.3	818	26	7	12	21	21	21
PIK3CA
	4JPS-mol1	-7.5	528	-4.316	-11.154	21.823	19	19	29
	4JPS-mol2	-7.7	528	-4.316	-11.154	21.823	20	20	29
	4JPS-mol3	-7.2	528	-4.316	-11.154	21.823	21	21	29
	4L23-mol1	-7	485	30.794	43.744	39.489	19	19	28
	4L23-mol2	-6.8	485	30.794	43.744	39.489	20	20	28
	4L23-mol3	-6.8	485	30.794	43.744	39.489	21	21	28

## Sheet: S4
	RADAR PLOT
BOILED-EGG GRAPH
